# Supplementary material
Source: Research Square preprint supplement (doi:10.21203/rs.3.rs-9116120/v1)
Supplement: Supplementary file 1 [file 3b3057239e7b866a0ec9e992.docx]

**Online Resource (Table S1 & Table S2)**

| **Predictor** | **p value** | **Odds ratio** | **Lower limit** | **Upper limit** |
| --- | --- | --- | --- | --- |
| Gender: Female | 0.110 | 0.553 | 0.2672 | 1.143 |
| Poorly differentiated/Signet | 0.038 | 2.096 | 1.0417 | 4.218 |
| Pre-operative T stage: |  |  |  |  |
| cT1 – cT2 | 0.848 | 1.257 | 0.1202 | 13.152 |
| cT3 – cT2 | 0.085 | 2.290 | 0.8914 | 5.882 |
| cT4 – cT2 | 0.663 | 1.396 | 0.3106 | 6.277 |
| Node positive | 0.059 | 1.811 | 0.9766 | 3.360 |
| cM1 (pre-operative M stage) | 0.002 | 7.957 | 2.1487 | 29.462 |
| SCRTa | 0.173 | 0.531 | 0.2139 | 1.321 |

ashort course radiotherapy, TNM Classification.

**Table S1** Multivariable Logistic regression for factors predicting surgical failure

|  | **Group 1** | **Group 2** | **Group 3** | **Group 4** | **Group 5** | **Group 6** |
| --- | --- | --- | --- | --- | --- | --- |
| **Characteristic** | **1-50**  **Na = 8** | **51-100 Na= 3** | **101-150 Na = 8** | **151-200 Na = 14** | **201-250 Na = 15** | **251-310 Na = 6** |
| Leak | 0 | 0 | 1 | 1 | 0 | 1 |
| Local recurrence | 1 | 0 | 2 | 1 | 1 | 0 |
| Stricture | 0 | 0 | 0 | 2 | 0 | 1 |
| Default | 0 | 1 | 2 | 2 | 1 | 0 |
| Systemic recurrence | 3 | 1 | 0 | 4 | 10 | 2 |
| Secondary APRb | 3 | 1 | 1 | 0 | 0 | 0 |
| Poor tone | 0 | 0 | 1 | 2 | 1 | 0 |
| Death | 1 | 0 | 1 | 1 | 2 | 1 |
| Rectovaginal fistula | 0 | 0 | 0 | 0 | 0 | 1 |
| Stoma reversal complication | 0 | 0 | 0 | 1 | 0 | 0 |

anumber of reasons for non-reversal of stoma in each group of 50 patients, bAbdomino-perineal resection

**Table S2** Group-specific reasons for non-reversal of stoma

Article Title: Learning curves for minimally-invasive intersphincteric resection using risk-adjusted cumulative sum curves

Journal Name: Techniques in Coloproctology

Sanjay Singh MS, M.Ch, 1,2 Mufaddal Kazi MS, M.Ch,1,2*  Ashwin Desouza MS, M.Ch,1,2  Ankit Sharma MS, M.Ch,1,2 Prudvi Raj MS, M.Ch,1,2 Suman Kumar Ankathi MD,2,3 Reena Engineer MD,2,4  Avanish Saklani MS, FRCS 1,2

1 Department of Colorectal and Robotic Surgery, Tata Memorial Centre, Mumbai, Maharashtra, India

2 Homi Bhabha National Institute, Mumbai, Maharashtra, India.

3 Department of Radiodiagnosis, Tata Memorial Centre, Mumbai, Maharashtra, India

4 Department of Radiation Oncology, Tata Memorial Centre, Mumbai, Maharashtra, India

*** Corresponding Author**

Mufaddal Kazi

Email: [mufaddalkazi@live.com](mailto:mufaddalkazi@live.com)
